# Supplementary material for: Evaluating downscaled products with expected hydroclimatic co-variances
Source: Copernicus journal article supplement (doi:10.5194/egusphere-2024-1456), 2024-06-05
Supplement: Supplementary file [file egusphere-2024-1456-AC2-supplement.pdf]

**RESPONSE TO REVIEWER #1 FOR *GEOSCIENTIFIC MODEL DEVELOPMENT*:  
MANUSCRIPT EGUSPHERE-2024-1456  
BY SEUNG H. BAEK, PAUL. A. ULLRICH, BO DONG, AND JIWOO LEE**

We thank Reviewer #1 for thoughtful and constructive feedback. This Response to the Reviewer file provides a complete documentation of the changes that have been made in response to each individual comment. Reviewer's comments are shown in plain text. Authors' responses are shown in **bold**. Quotations from the revised manuscript are shown in *bold italics*.

**Reviewer #1**

The paper deals with the evaluation of statistical and dynamical downscaling of the outputs of global climate models. The goals stated in the introduction are ambitious and interesting; however, the methods used have certain caveats, and the results do not bring any new findings, and the goals are not achieved. I recommend the rejection of the manuscript and encourage resubmission after the following comments are taken into account and the methodology is improved.

**We thank the Reviewer for the constructive comments. To our knowledge, it has not been observed elsewhere in the literature that statistical methods (at least the ones analyzed herein) diverge in estimated enhancement of frontal precipitation (an example of non-stationary process that is testable with just daily surface temperature and precipitation) that is otherwise robustly represented in dynamical methods (*e.g.*, raw GCMs and dynamical downscaling across 5 different regional climate models). We have made concerted efforts to highlight this novelty in our paper and more clearly state our new findings in our revised abstract.**

More detailed comments:

1. There are only a few references to related work (*e.g.*, regarding uncertainties related to downscaling methods, evaluation of covariance structure in downscaled products, etc.), and the results obtained are not compared to previous studies.

**We now reinforce the introduction section by citing several additional references. Giorgi (2018) and Lloyd et al. (2021) in particular comprehensively review the limitations of current RCMs (which we note in the manuscript). Regarding the comparison of our results to others, statistical downscaling methods to our knowledge have not yet been evaluated beyond single variable comparisons to observations (which we provide references for). The use of daily temperature and precipitation to examine key mechanisms in statistical downscaling products is a novel aspect of our paper not currently employed in the broader literature.**

2. The definitions of convective and frontal precipitation are rather simplistic. Only one event per year is selected, so only 21 days of each year are used for the analysis. This leads to only a limited amount of data analyzed. There is no discussion of possible other definitions or examples from the literature. Further, it is not quite clear how the events are selected. If the convective precipitation is defined using the annual maximum of air temperature, is it really the case that in every grid point the annual maximum of air temperature is followed by convective precipitation? Moreover, it is not clear how the "peak day" is chosen; further, "peak day" is only analyzed for observed datasets; it is not discussed whether it differs for the downscaling products and model outputs.

**We are very limited with the data we have over our disposal, as statistical downscaled products only provide daily temperature and precipitation outputs. While not comprehensive, the simplistic definitions are a strength of the paper insofar as they are required for uniform analyses that we can apply across statistical and dynamical downscaling. For convective precipitation in particular, we note that our definition is identical to that used in Zhang et al. (2023). We now stress this point in our manuscript:**

*“A central goal of our paper is to understand the representation of physical mechanisms in statistical downscaling products with only surface temperature and precipitation outputs (often the only two variables available with statistical downscaling). For this reason, we examine expected covariances between temperature and precipitation during convective and frontal precipitation events, including for the projection interval where the stationarity assumption may not hold.”*

**We believe the co-evolution of temperature, precipitation, and moist static energy shown are strongly indicative of convective and frontal precipitation mechanisms, respectively. As the Reviewer mentions, it is true that only one event per year is selected (and thus only 21 days of each year are analyzed). However, these 21 days are the most likely of each year to capture convective precipitation (according to the intuition embedded in our definition), and we do this on a grid-by-grid basis to in reality analyze up to ~20 million+ (depending on resolution of climate products and though not necessarily independent) “convective precipitation events.” While we do not expect every grid point of annual maximum of air temperature to be followed by convective precipitation, we do demonstrate this to be overwhelming the case, as each grid for the composite time series is weighted equally. In ERA5, the minimum precipitation anomaly for over 90% of the available grid points examined in our convective precipitation analysis occurs in day -2 to day 0. Therefore, it really is the case that for most (but admittedly not all) grid points, the annual maximum of air temperature is followed by convective precipitation. That is, by selecting for a very large sample size of events heavily biased for convective precipitation, we expect “noise” (*i.e.*, events not truly indicative of convective precipitation) to be negligible. Similar logic extends for frontal precipitation as well: in ERA5, the maximum precipitation anomaly for over 90% of the available grid points examined in our frontal precipitation analysis occurs in day +0 or day +1.**

We now clarify how “peak day” is chosen. For convective precipitation, we identify the day of highest daily maximum temperature (done grid-by-grid) for each year over 1980-2014. We then create a histogram of the number of times that the day of highest maximum temperature falls on a given day from 0 to 365 (thus days 0 – 365 are effectively histogram bins). Finally, we fit a discrete Fourier transform onto the histogram to identify the dominant frequency (*i.e.*, frequency corresponding to peak day) present in the data. We repeat similar steps but for day with the greatest drop in surface temperature for frontal precipitation. We now provide this clarification in the manuscript:

*“To evaluate our method of identifying precipitation events, we (i) identify grid-by-grid the day of convective and frontal precipitation, respectively, for each year over 1980-2014; (ii) create histograms of the number of times that the day of convective or frontal precipitation falls between day 0 and day 365 of each calendar year (days 0 – 365 are thus effectively histogram bins); and (iii) fit a discrete Fourier transform onto the respective histogram to identify the dominant frequency (i.e., frequency corresponding to peak day) present in the data.*

As mentioned by the Reviewer, we previously only examined peak day for the observed dataset. We now also examine peak day for the 8 raw CMIP6 models (reproduced below as Figure R2R1). The results for the model clearly show that, as with ERA5, convective precipitation is dominant in the summer and frontal precipitation is dominant in winter (notwithstanding orographic rain in the western US). Given this agreement with observations and the fact that the Fourier transform is only conducted on surface temperature (and thus do not examine the joint evolution of surface temperature and precipitation), it is well expected that our analyses are appropriate across observations, raw GCMs, statistical downscaling products, and dynamical downscaling products. Statistical downscaling products, for instance, will only enhance agreement between GCMs and observations when it comes to just a single field. Local meteorology simulated in dynamical downscaling is not expected to interfere with the seasonality inherent in GCMs.

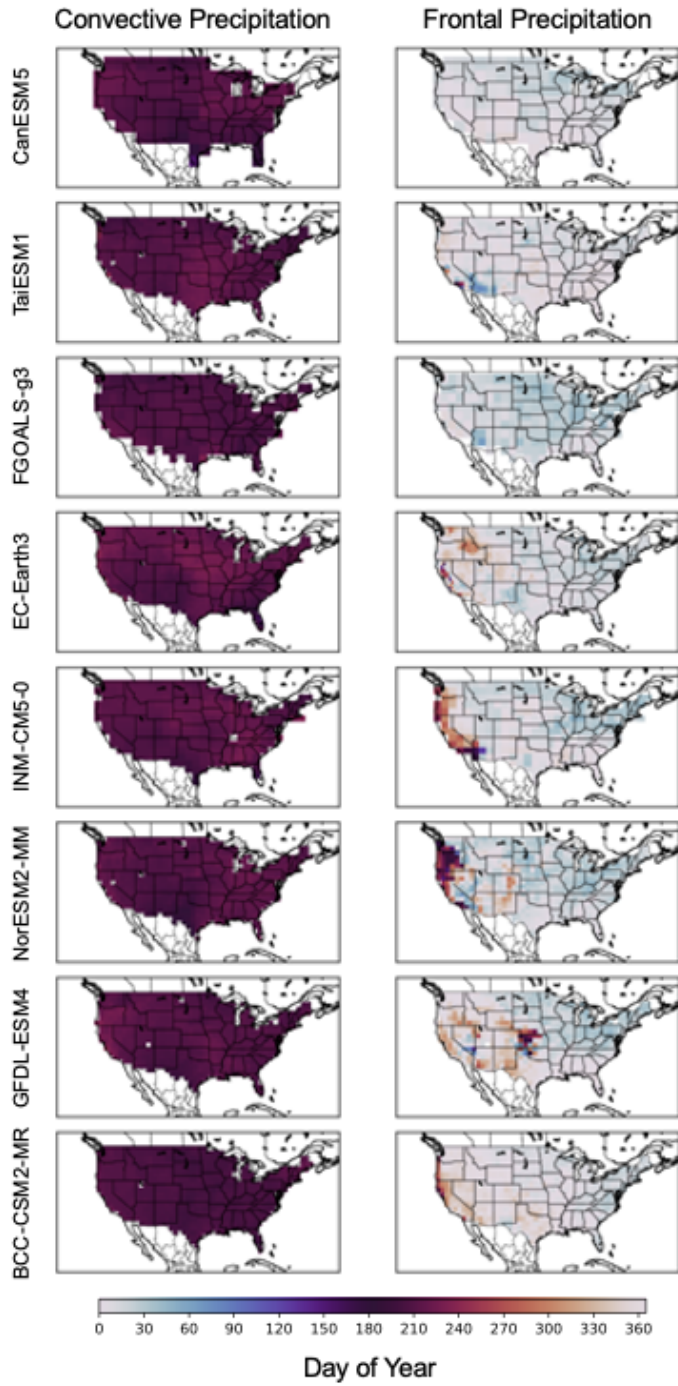

**Figure R2R1:** Same as Figure 3 of manuscript but for the 8 raw CMIP6 GCMs.

3. The data choice is not explained—why are only 8 CMIP6 GCMs used? For dynamical downscaling, the CMIP5-driven regional climate models are used, whereas for statistical downscaling, the CMIP6 GCMs are incorporated. In my opinion, the comparison of the results would be more informative if the same GCMs for both approaches were used. Moreover, there is no discussion of the choice of two specific statistical downscaling methods. It is claimed that they are "widely used" (l. 73). However, no references or examples are provided

**While we agree with the Reviewer that the comparison of the results would be more informative if the same GCMs for both approaches were used, the need for (i) same GCMs across LOCA2 and STAR-ESDM; (ii) availability of only CMIP5 models in dynamical downscaling efforts (*i.e.*, NA-CORDEX); and (iii) sufficient representation of a different regional climate models (we use five different RCMs) made this infeasible. The 8 CMIP6 models were chosen—admittedly somewhat arbitrarily—to balance the above-mentioned needs while also representing a sufficiently large ensemble size to show results that are robust across the CMIP6 ensemble (*i.e.*, any additional CMIP6 models would not appreciably change our results). We now note in the manuscript more clearly that the same 8 models are examined across the raw GCMs, LOCA2, and STAR-ESDM.**

**We nevertheless believe that 8 different lineage models (considered a large ensemble by most standards) is sufficient to minimize model-dependency. However, we verify this to be the case by performing an analysis similar to that of Figure 4 with three other CMIP6 models (CNRM-CM6-1, MPI-ESM-1-2-HAM, GISS-E2-2-G; provided below at Figure R2R2). Our results are therefore robust across 10+ different models. As noted by the Reviewer, the dynamical downscaling in NA-CORDEX uses CMIP5-driven regional climate models. However, we show that the behavior across five GCM-RCM combinations are highly consistent to those shown in the raw CMIP6 models.**

**Finally, we agree with the Reviewer that the specific choice of LOCA2 and STAR-ESDM was not well explained. We now provide 6 references to justify that LOCA2 and STAR-ESDM are widely-used. Equally importantly, we now state that the two techniques were “*selected to accompany the Fifth National Climate Assessment (NCA5; the preeminent guidance on national climate risks)*” to demonstrate that these two techniques are important operationally.**

1980-2014 Raw CMIP6

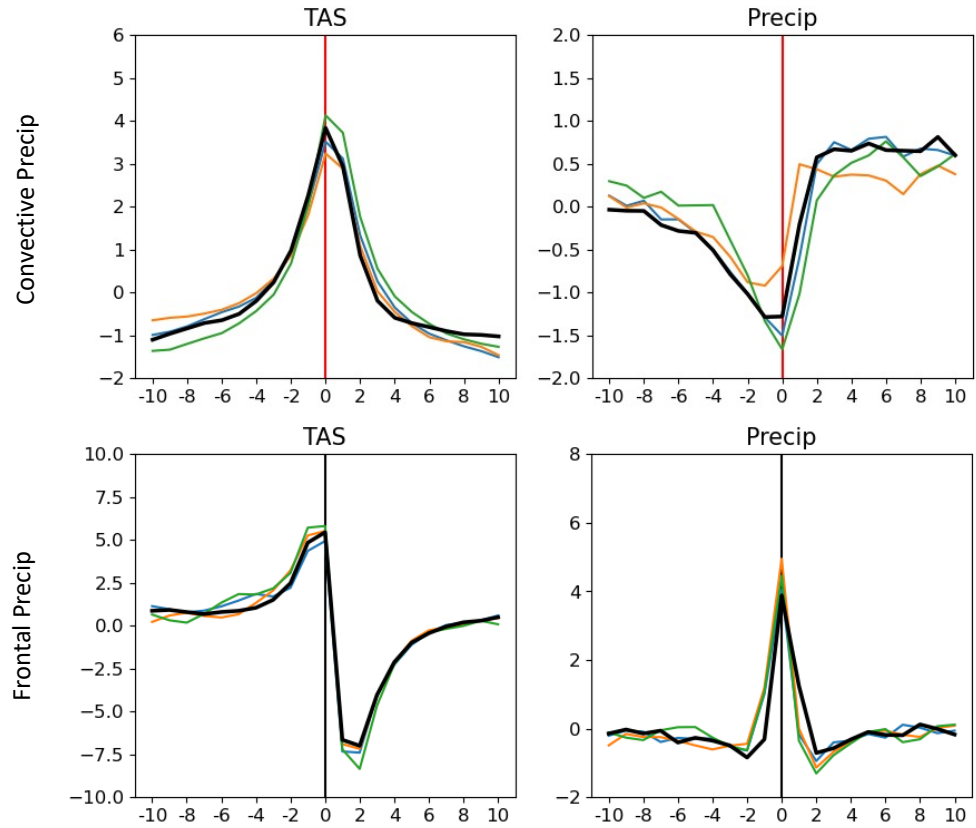

**Figure R2R2:** 21-day composite time series (spatially averaged over CONUS domain) of **(a)** surface temperature anomalies (K) and **(b)** precipitation anomalies (mm/day) for (colored lines) CNRM-CM6-1, MPI-ESM-1-2-HAM, GISS-E2-2-G raw CMIP6 GCM and (solid black line) ERA5 data. Time series are centered around the day of convective precipitation and for the 1980-2014 period **(d-f)** Same as (a-c) but for frontal precipitation.

4. The covariance between air temperature and precipitation is discussed, but it is not calculated, or the values are not shown. The results are only shown in graphical form, which avoids quantitative evaluation. Moreover, the definitions of both convective precipitation and frontal precipitation, as used here, include the assumption of a temperature-precipitation relationship, making the results less informative. It would be very beneficial if the authors could come up with any quantitative evaluation of the covariances, enabling comparison of assessed methods in some overview figure/table.

**Covariance between temperature and precipitation during convective and frontal precipitation events are highly nonlinear. For instance, additional warm anomalies do not necessarily produce stronger convective precipitation; it is also the case that greater temperature gradients (*i.e.*, steeper cold fronts) do not necessarily produce stronger frontal precipitation. More broadly, surface temperature exerts rather weak influences and non-linear influences on precipitation on daily timescales (Pearson's correlation of daily 1979-2015 surface temperature and precipitation over 24 to 49°N and 125 to 67°W (approximating CONUS domain) is only 0.04.) We note that higher correlations are found at monthly or seasonal timescales (*e.g.*, Zhao and Khalil, 1993, Trenberth and Shea, 2005) but such timescales are not suitable for the purposes of our study.**

**We nevertheless address the Reviewer's greater concern regarding the lack of quantitative evaluation of the relationship between temperature and precipitation. We now provide kernel density estimates (KDE) of precipitation anomalies before convection (day -2) and after convection (day +2) for the 35-year composite of convective precipitation events. If there is no skill in our selection of convective precipitation (*i.e.*, events are randomly selected), precipitation anomalies before and after day +0 should be approximately equal. However, our analyses show that 97% of the CONUS grid points show higher precipitation anomalies at day +2 relative to day -2, showing a 97/3 split rather than a 50/50 split. Our KDE analyses show that the distribution of anomalies are significantly different ( $p < 0.01$ ) with a Kolmogorov-Smirnov test.**

**We perform similar analyses for our frontal precipitation analyses: 93% of the maximum precipitation during the 21-days analyzed in our 35-year composite of events occur on day +0 or day +1 (randomly selected events would see about 2/21 odds of this). Precipitation anomalies during day +0 and day +1 are significantly different ( $p < 0.01$ ) from the rest of the (randomly selected) 21-day window with a Kolmogorov-Smirnov test. We now include the below Figure R2R3 in our manuscript.**

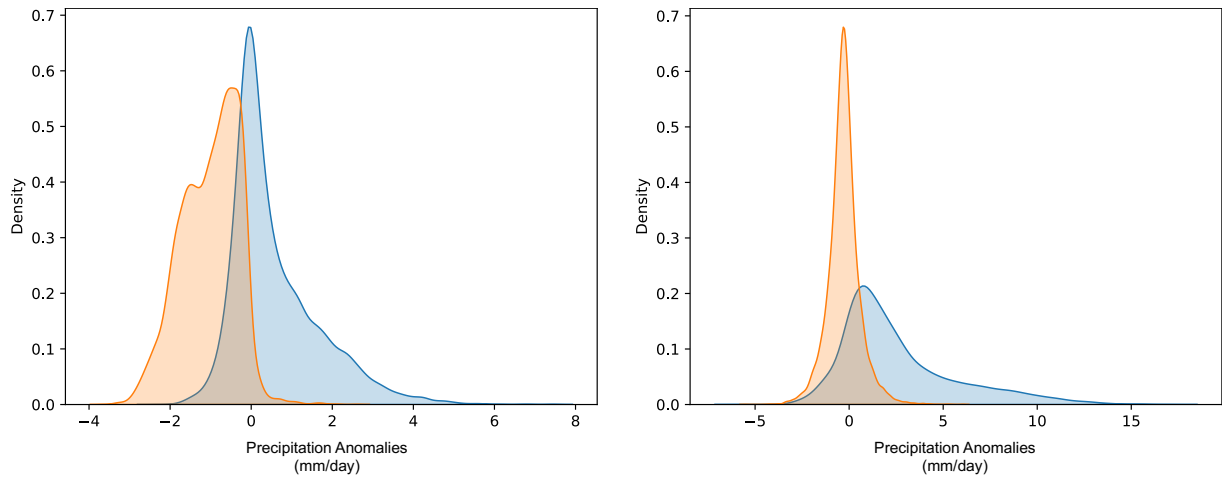

**Figure R2R3: (left)** Kernel density estimates (KDE) of convective precipitation anomalies before convection (orange; day -2) and after convection (blue; day +2) for the 35-year composite of convective precipitation events. 97% of grid points during the 21-days analyzed show higher precipitation anomalies after convection. The two KDEs are significantly different ( $p < 0.01$ ) as determined by a Kolmogorov-Smirnov test. **(right)** Kernel density estimates of frontal precipitation anomalies on day +0 and day +1 (blue) and all other days of the 21-day window analyzed (orange; randomly sampled). 93% of the maximum precipitation occur on day +0 or day +1. The two KDEs are significantly different ( $p < 0.01$ ) as determined by a Kolmogorov-Smirnov test.



5. It is not explained why the authors concentrate specifically on frontal and convective precipitation. There are plenty of ways how to analyze the temperature-precipitation relationship, and the arguments for this specific choice should be provided.

**A central goal of our paper is to understand the representation of physical mechanisms in statistical downscaling products with only daily surface temperature and precipitation outputs. The limited availability of variables we have at our disposal (combined with the need to represent physical mechanisms) made frontal and convective precipitation suitable mechanisms for our evaluation. We nevertheless agree with the Reviewer's larger comment that argument for this specific choice was not provided in the manuscript and have addressed this shortcoming:**

*“A central goal of our paper is to understand the representation of physical mechanisms in statistical downscaling products with only surface temperature and precipitation outputs (often the only two variables available with statistical downscaling). For this reason, we examine expected covariances between temperature and precipitation during convective and frontal precipitation events, including for the projection interval where the stationarity assumption may not hold.”*

6. The conclusions summarized in the last section are very vague. For example, "statistical downscaling may not capture structural change to meteorological phenomena under non-stationarity" or "the dampening to be a spurious feature ... presumably from historical functional relationship and/or the non-stationarity assumption". One of the goals of the study formulated in the introduction was to study these issues in more detail, so, the conclusions of the study should be much stronger and more concrete.

**We thank the Reviewer for the feedback. We have made concerted efforts to remove vague conclusions and, in their stead, provide more concrete ones more consistent with the stated goals of the paper. We now provide a substantially revamped Conclusion section, including a new paragraph dedicated to stronger conclusions:**

*“Our results are, to some extent, qualitatively intuitive: common statistical downscaling methods apply historical functional relationships to the future under the assumption that they will be preserved despite climate change. It is therefore somewhat expected that such techniques will provide lower skill for projections of non-stationary phenomena....Evaluation frameworks clearly demonstrating this to be the case has nevertheless proved elusive. Our work addresses this important gap by demonstrating that statistical downscaling methods diverge from estimated enhancement of frontal precipitation (an example of non-stationary process testable with just daily surface temperature and precipitation) where dynamical methods (e.g., raw GCMs and dynamical downscaling methods across 5 different regional climate models) do not...”*

7. ERA5 downscaled using dynamical downscaling - the references to NA-CORDEX (i.e., Mearns et al., 2017) nor the link to the NA-CORDEX data archive does not show any information about ERA5-driven simulations. From which source did the authors get the ERA5-driven simulations? The referred NA-CORDEX data include only ERA-Interim driven simulations.

**We meant ERA-Interim driven simulations (and not ERA5). We have corrected for this error.**

More specific/technical comments:

Figures, Figure captions: the term "composite" is not defined; precipitation anomalies shown in absolute values - this is not common, and the negative precipitation anomalies seem very strange; "MAE" and "SD" are not defined and explained; CONUS domain not defined; Fig. 4 - the parentheses are confusing, the caption needs to be reformulated to be more clear. Fig. 3 - for which dataset is it?

**We now define the term “composite” to refer to spatial averages over the CONUS domain. We also clarify in the figure captions that precipitation *anomalies* are shown relative to the 21-day window analyzed, resulting in both positive and negative values. We thank the Reviewer for the comment on not defining MAE. We now define MAE as mean absolute error in the figures. Upon re-reading the manuscript, we felt that the MAE and standard deviation (SD) provide somewhat repetitive information, so have opted to remove the standard deviation statistics from our paper. We have revised captions for Figure 3 and 4 to address the Reviewer’s comments.**

Tables: the list of models should be accompanied by more information, e.g., horizontal resolution of the models, modeling centers, etc.

**We have edited the two tables to now include the names of modeling centers and the horizontal resolution of the models.**

1. 50-51: extremes are not physical processes

**We have removed “extremes” from the sentence.**

1. 58-62: the credibility of methods and relevancy of outputs are presented here to argue for the importance of physical consistency of climate change projections, even though the relevancy is not really important. The credibility based on physical consistency would be enough to introduce the covariance issue.

**We have removed relevancy as motivation in our sentence.**

Section 2: the observed datasets are referred to in a strange manner (e.g., "Livneh-unsplit" is not explained"); The explanation of the STAR-ESDM algorithm is not clear, mainly the term

"dynamic climatology"; The length of the studied periods - 35 years - seems rather strange, is not really common. Further, the fact that the reference period of 1980-2014 includes the years 2006-2014, which belong to the scenario simulation in the case of NA-CORDEX simulations. This should be at least mentioned, even though it presumably does not influence the results much.

**We have improved our description of the observed datasets, including for STAR-ESDM: “The STAR-ESDM algorithm first disaggregates observations and GCM outputs into four separate components: the long-term trend, climatological annual cycle, annually-varying annual cycle, and high frequency daily anomalies.”** Though somewhat arbitrary (and admittedly uncommon), we chose the 1980-2014 period to be roughly comparable to the 1979-2021 analyses conducted by Zhang et al. (2023) (note 2014 is the last day of LOCA2 historical). We nevertheless do not expect our results to be sensitive to the period chosen, given the large sample size of events analyzed. As suggested, we now mention that the years 2006-2014 belong to the scenario simulation for NA-CORDEX: “note that the years 2006-2014 fall under the RCP8.5 scenario for NA-CORDEX.” We also now mentioned this in the caption of Figure 10.

l. 105: The spatial resolution of LOCA2 outputs is related to the spatial resolution of the underlying observed dataset, isn't it?

**Yes – we now note this in our manuscript: “The LOCA2 North American product uses an updated version of Livneh et al. 2015 with 6-km grid spacing as the training dataset (Pierce et al. 2021). Outputs from LOCA2 are also available at 6-km grid resolution.”**

l. 119: "Ground truth" is a strange and inappropriate term. The uncertainties related to reference datasets should be discussed.

**We agree with the Review and now state: “Although observational climate datasets themselves have inherent uncertainties (such as from generation, sampling, or resolution; Zumwald et al. 2020), strong consistency across ERA5 and the two observation-based products reinforce the credibility of ERA5.”** We have moreover removed all other instances of the phrase “ground truth.”

l. 130: it is not clear how the information in the sentence "We therefore follow..." is implied from the previous sentence.

**We agree and have removed “therefore.”**

Section 3: some of the terms used are confusing and uncommon, not well defined, e.g., "parallel time series", "post dynamical downscaling", "ensemble-mean differences" etc.

**We have made careful edits throughout Section 3 to clarify confusing and uncommon terms.**
